# Supplementary material
Source: publisher figshare collection journal article supplement (https://acs.figshare.com/ndownloader/files/10844426)
Supplement: Supplementary file 1 [file 10844426]

# Supplementary Figure 1

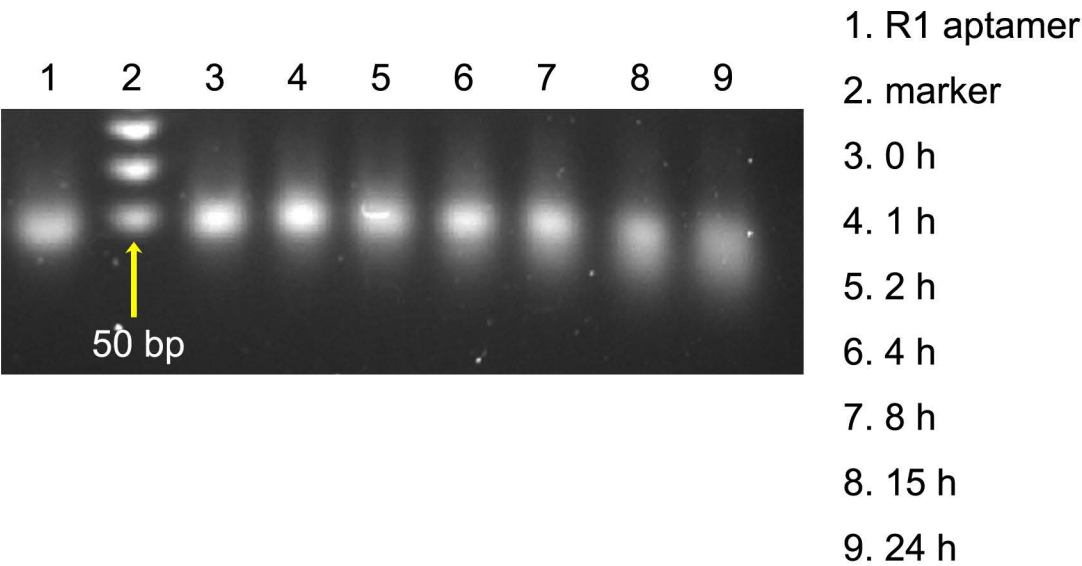

# Supplementary Figure 2

A

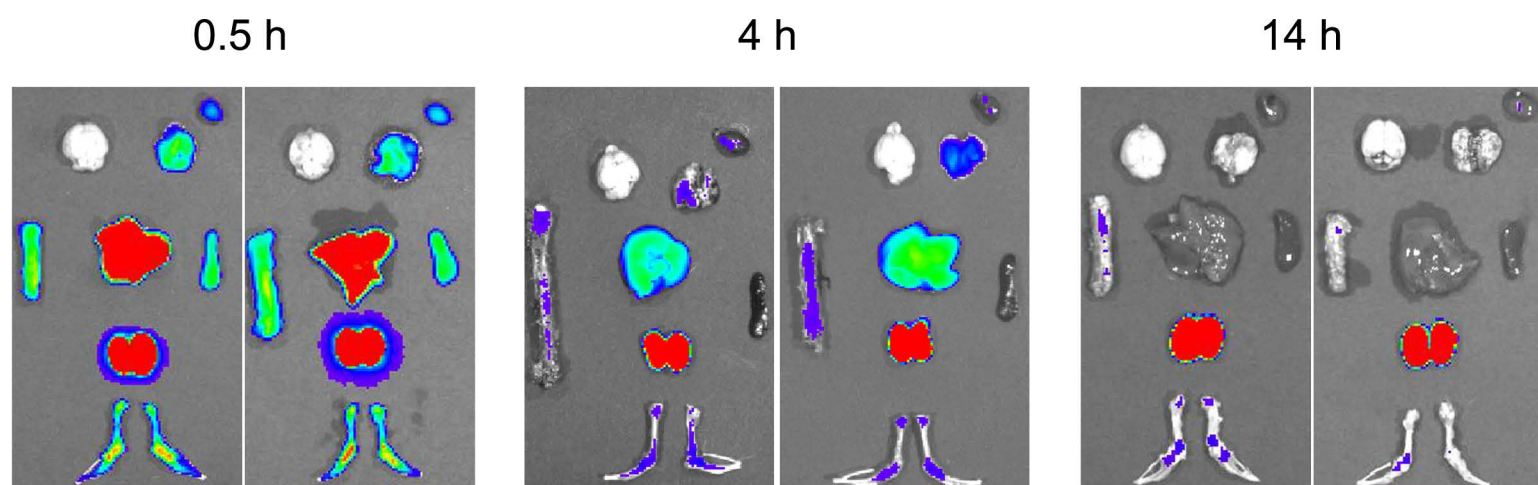

B

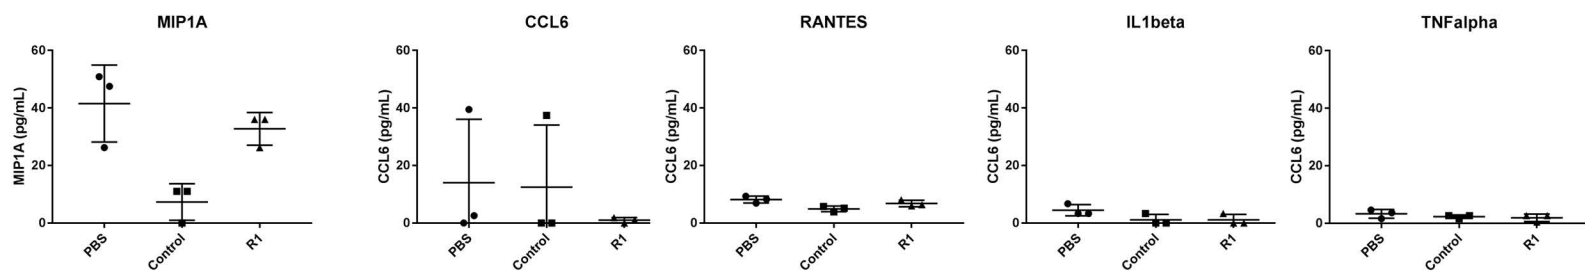

Supplementary Figure 3

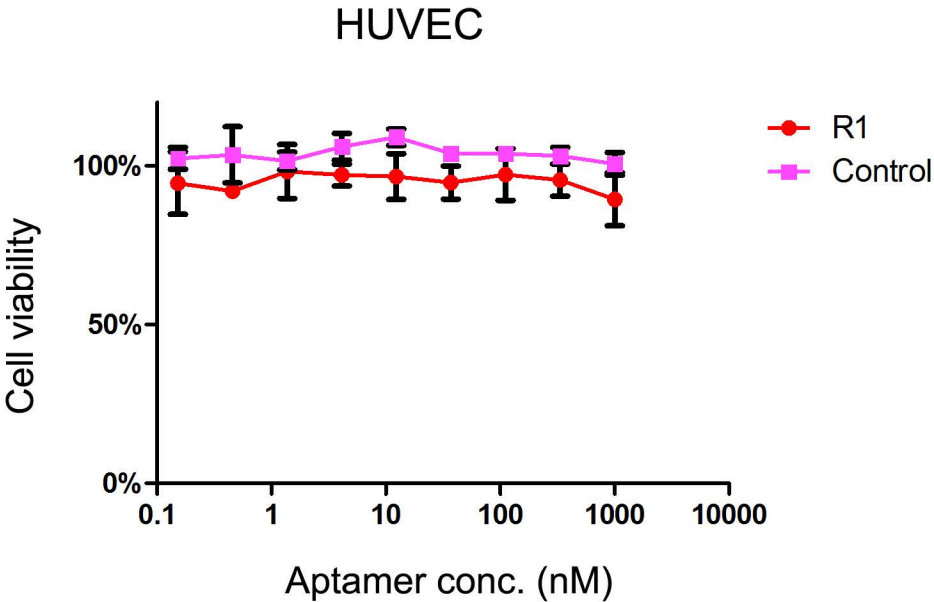

Supplementary Figure 4

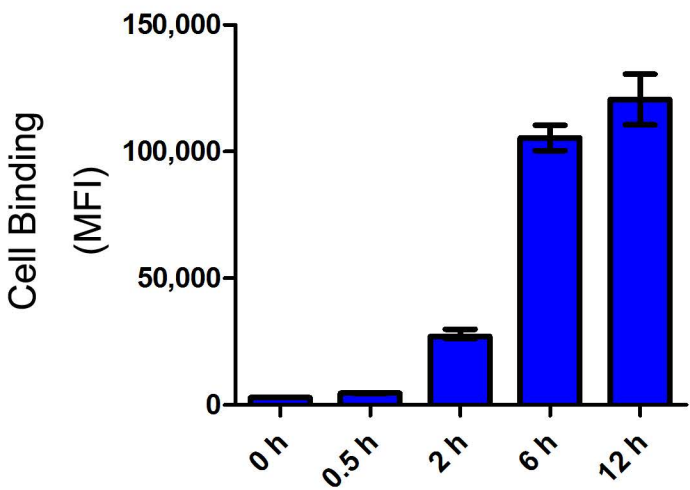

Duration time of HUVEC activation with conditioned media

Supplementary Figure 5

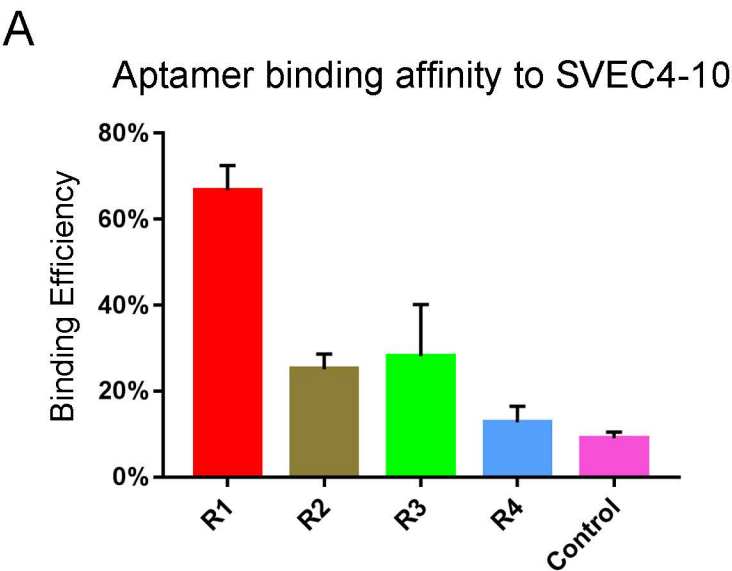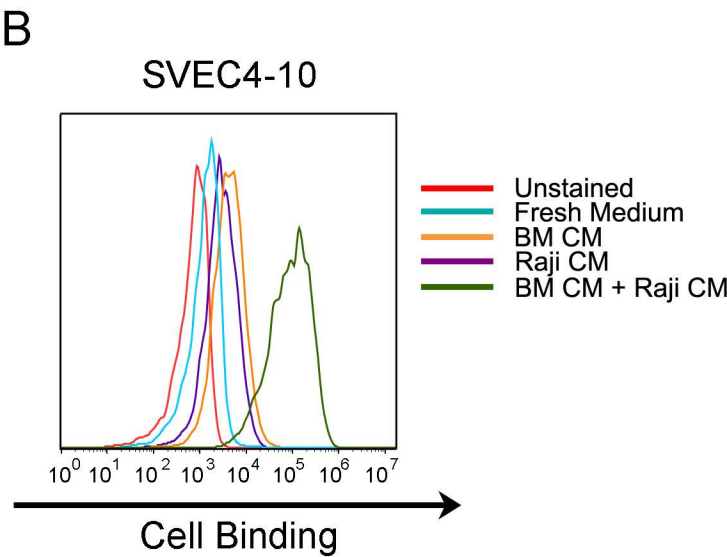

### **Legends of supplementary figures**

Supplementary figure 1. Stability of R1 aptamer in plasma.

Supplementary figure 2. (A) Biodistribution of Cy5-labeled R1 aptamers in healthy mice. Mice were euthanized at 0.5 hours, 4 hours and 14 hours post injection. Fluorescence intensity was monitored with a IVIS-200 system. (B) Administration of R1 do not induce cytokine/chemokine based immune toxicity.

Supplementary figure 3. No cytotoxicity effect of R1 on HUVECs.

Supplementary figure 4. Time dependent manner of HUVEC activation with conditioned media. HUVECs were incubated with Raji and bone marrow conditioned media for defined periods, followed by R1 incubation for 20 minutes. Median fluorescence intensity (MFI) was measured by flow cytometry.

Supplementary figure 5. (A) R1 affinity to murine endothelial cell line SVEC4-10. 50 nM R1, R2, R3, R4 and control aptamers were incubated with SVEC4-10 for 20 minutes. (B) R1 binding to SVEC4-10 can be promoted by mixed conditioned media. SVEC4-10 cells were activated with condition media for 6 hours, followed by incubation with 12.5 nM R1 aptamer for 20 minutes.
